# Supplementary material for: Transcriptional suppression of AMPKα1 promotes breast cancer metastasis upon oncogene activation
Source: PubMed Central journal article supplement — Proc Natl Acad Sci U S A. 2020 Mar 19;117(14):8013–21. doi: 10.1073/pnas.1914786117 (PMC7148563; doi:10.1073/pnas.1914786117), 2020-03-19
Supplement: pnas.1914786117.sapp.pdf [file pnas.1914786117.sapp.pdf]

## 1 **Supporting Information**

### 2 **Materials and methods**

#### 3 **Cell culture and drug treatments**

4 Human non-transformed mammary epithelial MCF10A cells were cultured in  
5 DMEM/F-12 1:1 medium (GIBCO, Rockville, MD, USA), supplemented with 20 ng/mL  
6 epidermal growth factor (Invitrogen, Carlsbad, CA, USA), 100 ng/mL cholera toxin (Sigma,  
7 St Louis, MO), 10 µg/mL insulin (Sigma), 500 ng/mL (95%) hydrocortisone (Sigma) and 5%  
8 of fetal bovine serum (FBS; Hyclone, Logan, UT, USA). HCC1806, Hs578T, FaDu and HEK  
9 293T cells were cultured in DMEM medium (GIBCO) supplemented with 10% FBS  
10 (Hyclone). Cells were grown in media supplemented 100 units/mL penicillin (GIBCO) and  
11 100 µg/mL streptomycin (GIBCO). Cells were maintained in a humidified 37°C incubator  
12 under a 5% CO<sub>2</sub> atmosphere. Cells at 75-85% confluence were treated with an indicated  
13 chemical compound(s). Rapamycin (37094), metformin (PHR1084), cycloheximide (CHX)  
14 (C7698), AMP (01930) and 2-deoxy-D-glucose (2-DG, D8375) were purchased from Sigma.  
15 AICAR (S1802), Lapatinib (S2111), LY294002 (S1105) and MK2206 (S1078) were  
16 purchased from Selleck (Houston, USA).

17

#### 18 **Plasmids transfection, lentiviral infection and RNA interference**

19 Cells at 80% confluence were transfected using Lipofectamine 2000 (Invitrogen).  
20 Expression plasmids including human E-cadherin, p110 $\alpha$ <sup>H1047R</sup>, HER2<sup>V659E</sup>, H-Ras<sup>G12V</sup>,  
21 AMPK $\alpha$ 1-WT, AMPK $\alpha$ 1-CA, AMPK $\alpha$ 1-Dn, TAp63 $\alpha$ , TAp63 $\gamma$ ,  $\Delta$ Np63  $\gamma$ ,  $\Delta$ Np63  $\beta$ ,  $\Delta$ Np63 $\alpha$   
22 and or  $\Delta$ Np63 $\alpha$ <sup>C306R</sup>. Lentiviruses were amplified by transfection of HEK 293T cells with

23 psPAX2 and pMD2.G packaging plasmids and Lentivirus expression plasmid using  
24 Lipofectamine 2000. Viruses were collected at 60 hours after transfection. Cells at 50%  
25 confluence in the presence of 10  $\mu\text{g}/\text{mL}$  polybrene were infected with recombinant  
26 Lentivirus encoding or an empty vector, followed by 12 hours incubation at 37°C with 5%  
27 CO<sub>2</sub>. Lentiviral-based shRNAs specific for green fluorescent protein (GFP), AMPK $\alpha$ 1,  
28 Twist1 or p63 were constructed as described (1). (The primer sequences were listed in SI  
29 Appendix, Table S1).

30

### 31 **Western blot, Immunofluorescence and IHC**

32 Cells were collected, washed with cold PBS, and resuspended in EBC<sub>250</sub> lysis buffer  
33 (250 mM NaCl, 50 mM Tris pH 8.0, 0.5% Nonidet P-40, 50 mM NaF, 0.5 mM Na<sub>3</sub>VO<sub>4</sub>, 1 mM  
34 phenylmethylsulfonyl fluoride (PMSF), 2  $\mu\text{g}/\text{mL}$  aprotinin, and 2  $\mu\text{g}/\text{mL}$  leupeptin). Equal  
35 amounts of protein were loaded, separated by SDS-PAGE, transferred to PVDF  
36 membranes (Millipore, Darmstadt, Germany), hybridized to an appropriate primary antibody  
37 and HRP-conjugated secondary antibody for subsequent detection by enhanced  
38 chemiluminescence. Antibody for p63 (sc-8431), AMPK $\alpha$ 2 (sc-19129), actin (sc-1615) and  
39 Twist1 (sc-15393) were purchased from Santa Cruz Biotech (CA, USA). Antibodies for  
40 phospho-AMPK (Thr172) (2535), phospho-S6 (2211), S6 (2217), phospho-S6K (9205),  
41 S6K (2708), Vimentin (5741), ZEB1 (3396), Integrin  $\beta$ 4 (4707), Integrin  $\alpha$ 5 (4705), p110 $\alpha$   
42 (4149), Ras (3965), phospho-AKT (4508), AKT (9272) and Slug (9585) were purchased  
43 from Cell Signaling Technology (Danvers, MA, USA). Antibody for E-cadherin (ab40772)  
44 and AMPK $\alpha$ 1 (ab32047) were purchased from Abcam (Cambridge, MA, USA). Flag (F1804)

45 was purchased from Sigma. HER2 (AH210) was purchased from Beyotime (Shanghai,  
46 China). For Immunofluorescent analyses, cells grown on coverslips were fixed with 4%  
47 polyformaldehyde in PBS, permeabilized with 0.1% Triton X-100 in PBS, blocked with 4%  
48 bovine serum albumin in PBS, hybridized to an appropriate primary antibody, and  
49 FITC-conjugated secondary antibody (Jackson ImmunoResearch, Westgrove, Pennsylvania,  
50 USA) and counter-staining using DAPI (Beyotime) for subsequent detection. Coverslips  
51 were mounted with ProLong Gold antifade reagent (Invitrogen). Images were acquired  
52 using Leica TCS SP5 II system. IHC analyses were performed as previously described (2).  
53 For quantitative analyses, slides were scanned through NanoZoomer (Hamamatsu, Japan).  
54 Scanned images were then subjected to integrated optical density (IOD) measurements  
55 using Image-Pro Plus 6.0 to calculate average optical density (AOD) using the formula:  
56  $AOD=IOD/Area^{(3)}$ . Human breast tumor tissue microarrays (TMA) consisting of breast  
57 cancer specimens from different patients were purchased from Shanghai Outdo Co., LTD  
58 (Shang Hai, China).

59

## 60 **Quantitative PCR**

61 Total RNA was extracted from cells using RNeasy plus Mini Kit (QIAGEN) and  
62 reverse-transcribed. qPCR was carried out for AMPK $\alpha$ 1, E-cadherin, Twist1, slug and  
63 GAPDH (The primer sequences used in the reactions were listed in Table S1). The qPCR  
64 reactions were performed in CFX-960 Real time PCR System (Bio-Rad) and using Bio-Rad  
65 SoFast Eva-Green Supermix Kit (Bio-Rad) according to the manufacturer's instructions.  
66 Relative quantitation values were calculated using the  $\Delta\Delta C_t$  method.

67

## 68 **Chromatin immunoprecipitation (ChIP) assay**

69       ChIP assays were performed in MCF10A cells with ChIP-IT Kit (Active Motif, USA)  
70 using antibodies specific for p63 (ab97865, Abcam) or normal rabbit IgG (Invitrogen), as  
71 described previously (4). ChIP samples were subjected to PCR experiments to amplify  
72 fragments of the AMPK $\alpha$ 1 promoter elements using indicated primers as listed in Table S1.  
73 To examine the strength of p63 for binding to AMPK $\alpha$ 1 promoter elements, ChIP samples  
74 were subjected to qPCR or reverse transcriptional PCR using primers as indicated. The  
75 value of each ChIP sample was normalized to its corresponding input.

76

## 77 **Invasion transwell assay**

78       Cell invasion was measured using Matrigel-coated inserts (BD Biosciences). Cells (5.0  
79  $\times 10^4$ ) were suspended in serum-free DMEM (for Hs578T and HCC1806 cells) or  
80 DMEM:F12 (for MCF10A cells) media and seeded into the inner chamber. The outer  
81 chamber was filled with normal growth media (as described previously for each cell type).  
82 Cells were incubated for 24 h. Non-migrating cells were carefully removed with a cotton  
83 swab. Migrating cells were stained with 0.1% crystal violet for 10 min at room temperature,  
84 and photographed under a Nikon light microscope. At least 100 cells from five random  
85 fields were counted.

86

## 87 **Luciferase reporter assays**

88       Luciferase reporter assays were performed with Secrete-Pair<sup>TM</sup> Dual Luminescence

89 Assay Kit (GeneCopoeia, USA) according to the manufacturer's instructions. Briefly, cells  
90 were co-transfected with 500 ng of AMPK $\alpha$ 1-Gluc-SEAP reporter and 750 ng of p63  
91 expression plasmid. 36 hours post-transfection, cell culture media were collected and  
92 AMPK $\alpha$ 1-Gluc and SEAP activities were measured. The AMPK $\alpha$ -Gluc activity was  
93 normalized to SEAP activity.

94

### 95 **Cell-cell adhesion assay**

96 To assess cell-cell adhesion, 150 cells/well were seeded in 6-well plates and grown for  
97 6 to 10 days to allow colony formation. Cells were then fixed with methanol for 15 min,  
98 stained with 0.1% crystal violet for 10 min at room temperature, and photographed under a  
99 Nikon light microscope. Micro-colonies were defined to contain at least four cells clustered  
100 together. The number of micro-colonies of each well were counted, normalized and  
101 presented to reflect cell-cell adhesion ability.

102

### 103 **In vivo metastasis assay**

104 Animal care and experiments in this study were carried out according the principles  
105 outlined in Guide for the Care and Use of Laboratory Animals published by the USA  
106 National Institutes of Health (NIH). Cells suspended in 100  $\mu$ L PBS were injected into the  
107 lateral tail veins of 5-week old female nude mice. Mice were observed daily and euthanized  
108 at designated day. The lungs were dissected, fixed overnight in 4% polyformaldehyde,  
109 embedded in paraffin and sectioned onto microscope slides for hematoxylin and eosin  
110 (H&E) staining prior to histological analysis. The numbers of metastatic nodules in the lungs

111 per mouse were counted. To examine the effects of pharmacological activators of AMPK on  
112 breast tumor metastasis in vivo, seven-week old MMTV-PyMT female FVB mice (n=6/group)  
113 were intraperitoneally injected daily for 46 days with metformin (200 mg/kg) or PBS.  
114 Alternatively, twelve-week old MMTV-PyMT female C57BL/6 mice (n=4/group) were  
115 intraperitoneally injected every other day for 20 days with AICAR (400 mg/kg) or PBS. Mice  
116 were sacrificed and the primary mammary tumors and lungs were dissected, fixed and  
117 sectioned.

118

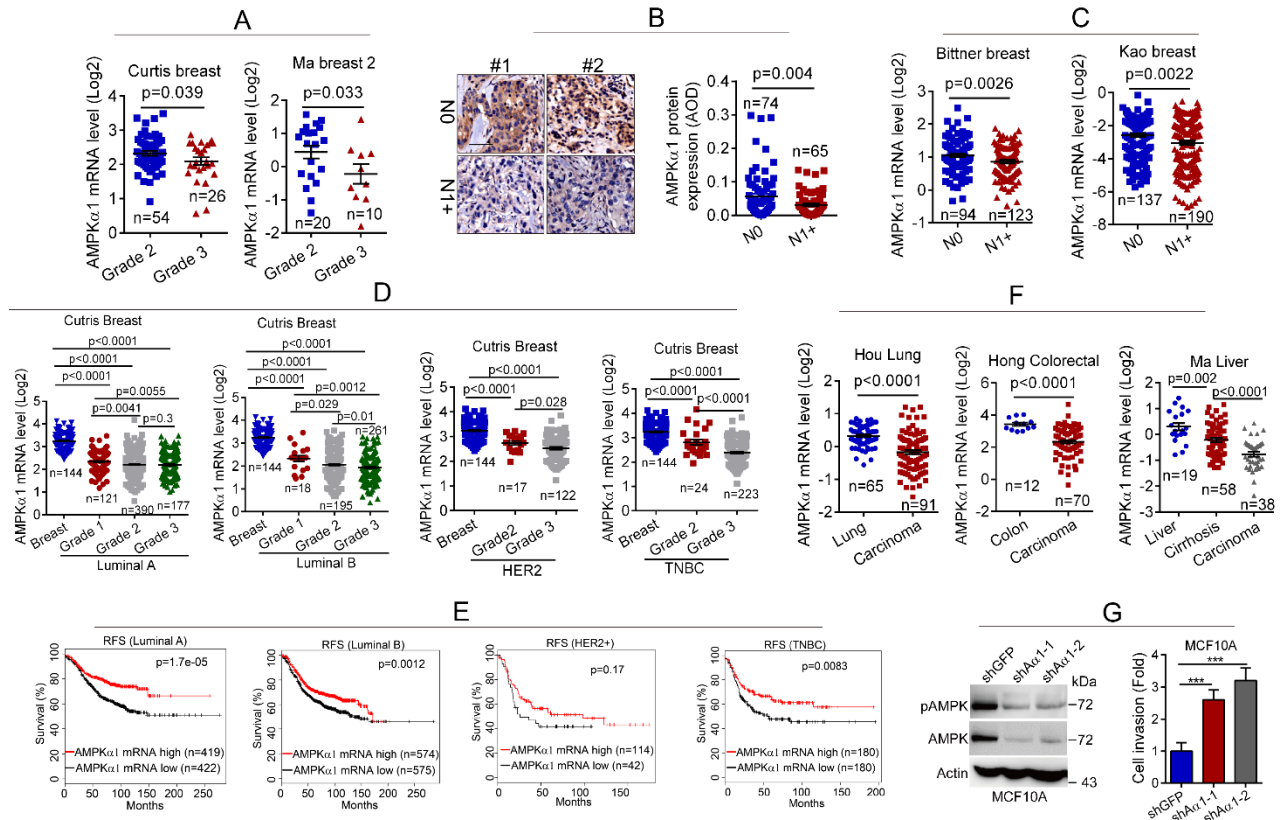

119

120

121

122

123

124

125

126

127

128

129

130

131

132

133

134

135

136

137

**Fig. S1. AMPK $\alpha$ 1 mRNA expression is reduced in advanced human breast cancer.** (A) The AMPK $\alpha$ 1 mRNA levels in human breast cancer at different stages were analyzed using Oncomine Curtis breast dataset and Ma breast 2 dataset. (B) Human breast cancer tissue microarray consisting of lymph node-negative (N0, n=74) or lymph node-positive (N1+, n=65) breast cancer samples were subjected to IHC staining for AMPK $\alpha$ 1 (Left panel) with quantitative analyses using average optical density (AOD) (Right panel). (C) The AMPK $\alpha$ 1 mRNA levels in N0 or N1+ human breast cancer were analyzed using Oncomine Bitter breast dataset and Kao breast dataset. (D) The AMPK $\alpha$ 1 mRNA levels in luminal A, luminal B, HER2 positive (HER2+) or triple negative breast cancer (TNBC) at different stages were analyzed using Oncomine Curtis breast dataset. (E) The correlation between the AMPK $\alpha$ 1 mRNA levels and recurrence free survival (RFS) in luminal A, luminal B, HER2+ or TNBC breast cancer patients were analyzed using Kaplan-Meier Plotter database. Split patients by median was used to analyze Luminal A, Luminal B and TNBC breast cancers. Split patients by best cutoff was used to analyze HER2+ breast cancers. (F) The AMPK $\alpha$ 1 mRNA levels in human colon cancer, lung cancer and liver cancer were analyzed using the Oncomine Hou lung dataset, Hong Colorectal dataset and Ma liver dataset. (G) **Ablation of AMPK  $\alpha$ 1 expression promotes cell invasion.** MCF10A cells stably expressing shGFP, shAMPK $\alpha$ 1-1 (shA $\alpha$ 1-1) or shAMPK $\alpha$ 1-2 (shA $\alpha$ 1-2) were subjected to western blot analyses (Left panel) or transwell assays for cell invasion (Right panel). Data are presented as means  $\pm$  SEM. \*\*\*, p < 0.001.





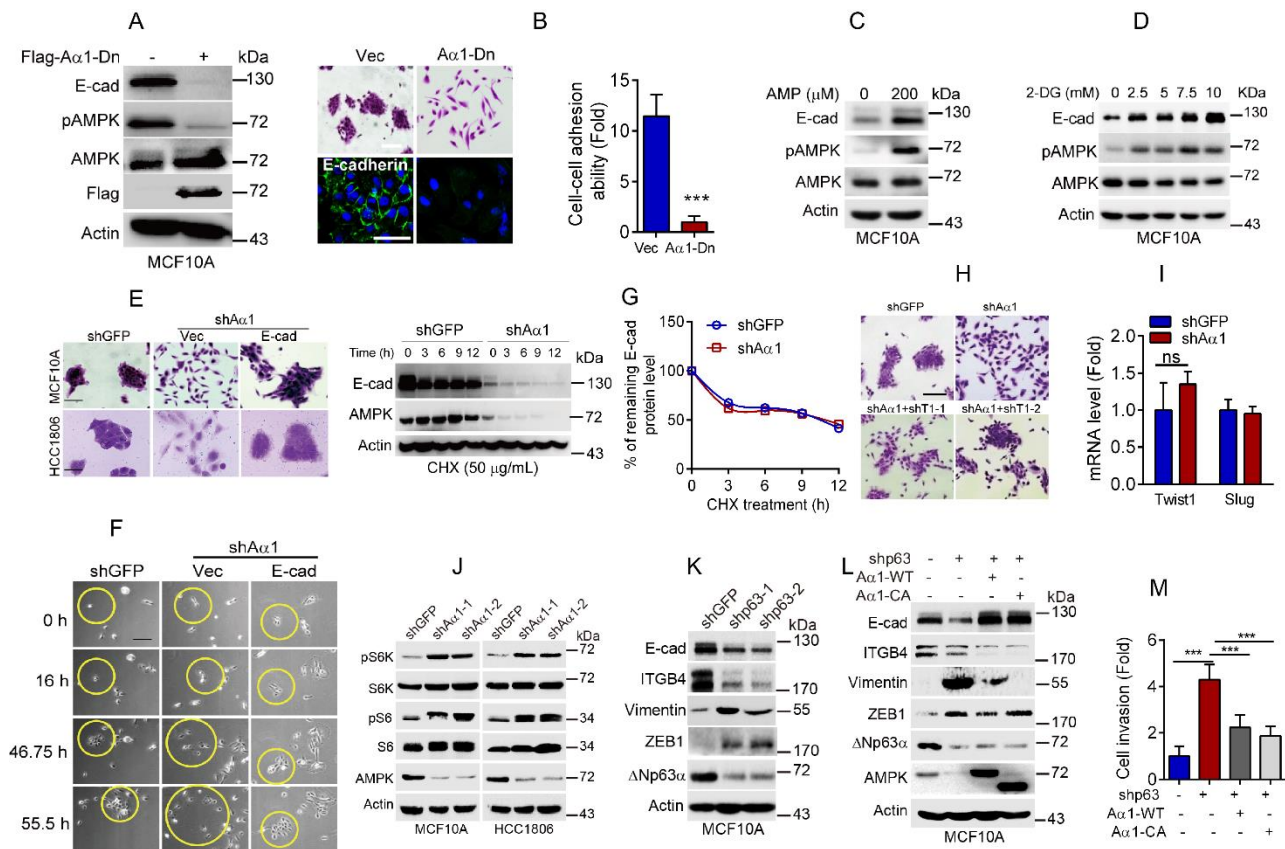

153

154

155

156

157

158

159

160

161

162

163

164

165

166

167

168

169

170

171

172

173

174

175

176

**Fig.S3. Alteration of AMPK activity affects E-cadherin protein expression and cell-cell adhesion.** (A-B) MCF10A cells stably expressing dominant negative mutant flag-AMPK $\alpha$ 1-D139A (A $\alpha$ 1-Dn) were subjected to western blot analyses (A), staining with 0.1% crystal violet or immunofluorescent staining for E-cadherin. Representative micrographs and cell-cell adhesion ability, as defined in the Materials and Methods, were presented (B). (C-D) MCF10A cells were treated with AMP or an indicated dose of 2-Deoxy-D-glucose (2-DG) for 24 h prior to western blot analyses. (E-F) MCF10A-shA $\alpha$ 1-1 or HCC1806-shA $\alpha$ 1-1 cells stably expressing E-cadherin were stained with crystal violet and representative micrographs were shown (E). To visualize the dynamic cell-cell adhesion during cell proliferation, MCF10A-shA $\alpha$ 1 cells with or without restoration of E-cadherin expression were subjected to monitoring cell adhesion under the Living Cell Imaging System. Representative snap-shots at the indicated time intervals were shown. Circles pointed to dynamics of cell adhesion during the time course (F). (G-J) Silencing of AMPK $\alpha$ 1 results in down regulation of E-cadherin expression through a mTOR-Twist1-dependent pathway. MCF10A-shA $\alpha$ 1 or MCF10A-shGFP cells were subjected to protein half-life assays upon cycloheximide (CHX) treatment (G). MCF10A-shA $\alpha$ 1 cells stably expressing shTwist1-1 (shT1-1) or shTwist1-2 (shT1-2) were stained with crystal violet and representative micrographs were shown (H). MCF10A-shA $\alpha$ 1 or MCF10A-shGFP cells were subjected to Q-PCR analyses for Twist1 or Slug (I). MCF10A-shA $\alpha$ 1-1, MCF10A-shA $\alpha$ 1-2 or MCF10A-shGFP cells were subjected to western blot analyses (J). (K-M) Ectopic expression of AMPK inhibits silencing of p63-induced cell invasion. MCF10A cells stably expressing shp63-1 or shp63-2 were subjected to western blot analyses (K). MCF10A-shp63 cells stably expressing wild type flag-AMPK $\alpha$ 1 (A $\alpha$ 1-WT) or constitutively active flag-AMPK $\alpha$ 1-T172D (A $\alpha$ 1-CA) were subjected to western blot analyses (L) or transwell assays for cell invasion (M). Data are presented as means  $\pm$  SEM. \*\*\*,  $p < 0.001$ ; ns, no

177 significance. Scale bar=50  $\mu$ m.

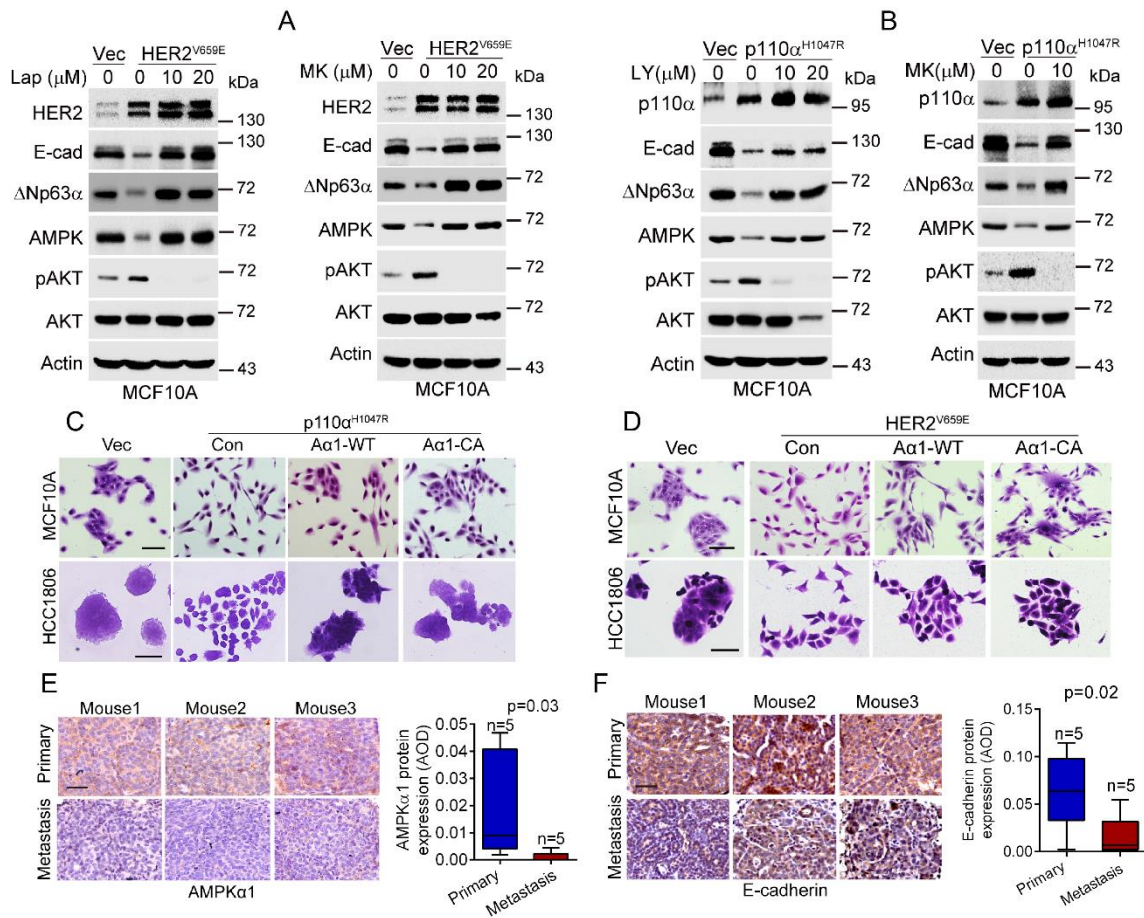

178

179 **Fig. S4. Pharmacological inhibiting HER2 or PI3K signaling significantly rescues activated**  
 180 **HER2 or PI3K-induced downregulation of ΔNp63α, AMPK and E-cadherin expression.** (A-B)  
 181 MCF10A-HER2<sup>V659E</sup> cells were treated with an indicated concentration lapatinib (Lap, HER2  
 182 inhibitor) or MK2206 (MK, AKT inhibitor) for 24 h (A) or MCF10A-p110α<sup>H1047R</sup> cells were treated with  
 183 an indicated concentration LY294002 (LY, PI3K inhibitor) or MK2206 for 24 h (B). Whole cell lysates  
 184 were subjected to western blot analyses. (C-D) Ectopic expression of AMPK markedly inhibits  
 185 PI3K/HER2-induced disruption of cell-cell adhesion. MCF10A-p110α<sup>H1047R</sup>,  
 186 HCC1806-p110α<sup>H1047R</sup>, MCF10A-HER2<sup>V659E</sup> or HCC1806-HER2<sup>V659E</sup> cells stably expressing  
 187 Aα1-WT or Aα1-CA were stained with crystal violet and representative micrographs were shown.  
 188 Scale bar=50  $\mu$ m. (E-F) The sections of primary mammary tumors or lung metastasized tumors  
 189 derived from the same MMTV-PyMT female FVB mouse (n=5, 95 days old) were subjected to IHC  
 190 staining for protein expression of AMPKα1 (E) or E-cadherin (F). Average optical density (AOD) was  
 191 presented. Scale bar=50  $\mu$ m.

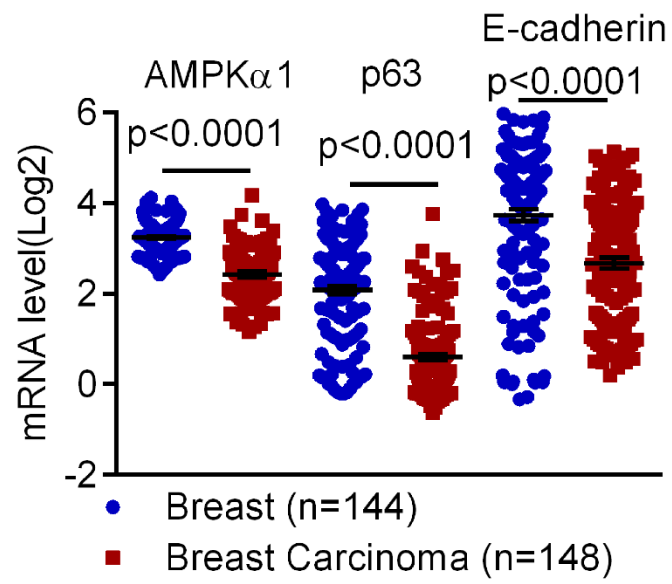

192

193

194

195

196

**Fig. S5. Expression of AMPK $\alpha$ 1, p63 and E-cadherin in human breast cancer.** The Oncomine Curtis breast dataset was analyzed for mRNA levels of AMPK $\alpha$ 1, p63 or E-cadherin in human normal breast or breast carcinoma.

**Table S1. Primers were used in this study.**

| Target            | Application | Sequence                    |
|-------------------|-------------|-----------------------------|
| GFP               | shRNA       | GAAGCAGCACGACTTCTTC         |
| P63               | shRNA-1     | GAGTGGAAATGACTTCAACTTT      |
| P63               | shRNA-2     | CCGTTTCGTCAGAACACACAT       |
| AMPK $\alpha$ 1   | shRNA-1     | GTATGATGTCAGATGGTGAATT      |
| AMPK $\alpha$ 1   | shRNA-2     | GTTGCCTACCATCTCATAATA       |
| Twist1            | shRNA-1     | GCTGAGCAAGATTCAGACC         |
| Twist1            | shRNA-2     | GTACATCGACTTCCTCTAC         |
| Twist1 F          | Q-PCR       | TGTCCGCGTCCCCTAGC           |
| Twist1 R          | Q-PCR       | TGTCCATTTTCTCCTTCTCTGGA     |
| Slug F            | Q-PCR       | CTGGGCTGGCCAAACATAAG        |
| Slug R            | Q-PCR       | CCTTGTCACAGTATTTACAGCTGAAAG |
| AMPK $\alpha$ 1 F | Q-PCR       | TGCGTGTACGAAGGAAGAATCC      |
| AMPK $\alpha$ 1 R | Q-PCR       | TGTGACTTCCAGGTCTTGGAGTT     |
| E-cadherin F      | Q-PCR       | GGATGTGCTGGATGTGAATG        |
| E-cadherin R      | Q-PCR       | CACATCAGACAGGATCAGCAGAA     |
| GAPDH F           | Q-PCR       | GGGGAGCCAAAAAGGGTCATCATCT   |
| GAPDH R           | Q-PCR       | GAGGGGCCATCCACAGTCTTCT      |
| P1 F              | CHIP        | GTACTGGTGATTCTCCTGGCAG      |
| P1 R              | CHIP        | GGCGCTGCGGGAGGGGGCGGA       |
| P2 F              | CHIP        | CAGATGTGCATCACTCAAGCGG      |

|         |      |                              |     |
|---------|------|------------------------------|-----|
| P2 R    | CHIP | CCGCCTCCTCGCCCCGCATCCT       | 198 |
| P3 F    | CHIP | AGGATCACCTCCAGAAGAAAACAC     | 199 |
| P3 R    | CHIP | ATCTTTCCTTCTCGGATGGAATC      | 200 |
| P4 F    | CHIP | TTGCCCTTCAAACAATGTGCAGTCCTC  | 201 |
| P4 R    | CHIP | TCTGAAATCAAAGTAACATGC        | 202 |
| ITGA6 F | CHIP | GCAAAAAGAAACACCTACCTCATAGGAC | 203 |
| ITGA6 R | CHIP | GGGACTACAGCTGTGTAGACTGTTCTG  | 204 |
| LAMC2 F | CHIP | GGTACTTTATGAGTTGCTAACCCTGGTG | 205 |
| LAMC2 R | CHIP | CCCAATCTTAAGAGCGCTAACTCAGAAA | 206 |
|         |      |                              | 207 |

208

209 **SI References**

210 1. Bergholz J, *et al.* (2014) DeltaNp63alpha regulates Erk signaling via MKP3 to inhibit  
211 cancer metastasis. *Oncogene* 33(2):212-224.

212 2. Hu L, *et al.* (2017) DeltaNp63alpha is a common inhibitory target in oncogenic  
213 PI3K/Ras/Her2-induced cell motility and tumor metastasis. *Proceedings of the*  
214 *National Academy of Sciences of the United States of America*  
215 114(20):E3964-E3973.

216 3. Tilley WD, *et al.* (1994) Detection of discrete androgen receptor epitopes in prostate  
217 cancer by immunostaining: measurement by color video image analysis. *Cancer*  
218 *research* 54(15):4096-4102.

219 4. Wu J, *et al.* (2014) DeltaNp63alpha activates CD82 metastasis suppressor to inhibit  
220 cancer cell invasion. *Cell death & disease* 5:e1280.

221
